# Supplementary material for: An automated evaluation agent for Q&A pairs and reticular synthesis conditions
Source: Royal Society of Chemistry journal article supplement (doi:10.1039/d5dd00413f), 2025-11-18
Supplement: d5dd00413f1.pdf [file d5dd00413f1.pdf]

Supporting Information

*for*

**An Automated Evaluation Agent for Q&A Pairs and Reticular Synthesis Conditions**

Nakul Rampal<sup>1,2,3†</sup>, Dongrong Joe Fu<sup>3†</sup>, Chengbin Zhao<sup>1,2,3</sup>, Hanan S. Murayshid<sup>4</sup>, Albatool A. Abaalkhail<sup>5</sup>, Nahla E. Alhazmi<sup>6</sup>, Majed O. Alawad<sup>7</sup>, Christian Borgs<sup>3,8,\*</sup>, Jennifer T. Chayes<sup>3,8,9,10,11\*</sup>, Omar M. Yaghi<sup>1,2,3,7\*</sup>

<sup>1</sup>Department of Chemistry, University of California, Berkeley, California 94720, United States

<sup>2</sup>Kavli Energy Nanoscience Institute, University of California, Berkeley, California 94720, United States

<sup>3</sup>Bakar Institute of Digital Materials for the Planet, College of Computing, Data Science, and Society, University of California, Berkeley, California 94720, United States

<sup>4</sup>Artificial Intelligence & Robotics Institute, King Abdulaziz City for Science and Technology (KACST), Riyadh 11442, Saudi Arabia

<sup>5</sup>Center of Excellence for Advanced Materials and Manufacturing, King Abdulaziz City for Science and Technology (KACST)

<sup>6</sup>Hydrogen Technologies Institute, King Abdulaziz City for Science and Technology (KACST), Riyadh 11442, Saudi Arabia

<sup>7</sup>KACST–UC Berkeley Center of Excellence for Nanomaterials for Clean Energy Applications, King Abdulaziz City for Science and Technology, Riyadh 11442, Saudi Arabia

<sup>8</sup>Department of Electrical Engineering and Computer Sciences, University of California, Berkeley, California 94720,  
United States

<sup>9</sup>Department of Mathematics, University of California, Berkeley, California 94720, United States

<sup>10</sup>Department of Statistics, University of California, Berkeley, California 94720, United States

<sup>11</sup>School of Information, University of California, Berkeley, California, 94720, United States

\*Email: borgs@berkeley.edu, jchayes@berkeley.edu, yaghi@berkeley.edu

†Contributed equally

| Prompt                                                                                                                                                                                                                                                                                                                                                                                                                                                                                                                                                                                                                                                                                                                                                                                                                                                                                                                                                                                                                                                                                                                                                                                                                                                                                                                                                                                                                                                                                                                                                                                                                                                                                                                                                                                                                                                                                                                                                                                                                                                                                                                                                                                                                                                                                                                                                                                                                                                                                                                                                                                                                                                                                                                                                                                                                                                                                                                                                                                                                                                                                                                                                                                                                                                                                                                                                                                                                                                                                                                                                                                                                         |
|--------------------------------------------------------------------------------------------------------------------------------------------------------------------------------------------------------------------------------------------------------------------------------------------------------------------------------------------------------------------------------------------------------------------------------------------------------------------------------------------------------------------------------------------------------------------------------------------------------------------------------------------------------------------------------------------------------------------------------------------------------------------------------------------------------------------------------------------------------------------------------------------------------------------------------------------------------------------------------------------------------------------------------------------------------------------------------------------------------------------------------------------------------------------------------------------------------------------------------------------------------------------------------------------------------------------------------------------------------------------------------------------------------------------------------------------------------------------------------------------------------------------------------------------------------------------------------------------------------------------------------------------------------------------------------------------------------------------------------------------------------------------------------------------------------------------------------------------------------------------------------------------------------------------------------------------------------------------------------------------------------------------------------------------------------------------------------------------------------------------------------------------------------------------------------------------------------------------------------------------------------------------------------------------------------------------------------------------------------------------------------------------------------------------------------------------------------------------------------------------------------------------------------------------------------------------------------------------------------------------------------------------------------------------------------------------------------------------------------------------------------------------------------------------------------------------------------------------------------------------------------------------------------------------------------------------------------------------------------------------------------------------------------------------------------------------------------------------------------------------------------------------------------------------------------------------------------------------------------------------------------------------------------------------------------------------------------------------------------------------------------------------------------------------------------------------------------------------------------------------------------------------------------------------------------------------------------------------------------------------------------|
| <p><b>"System instruction":</b> "You are a Q&amp;A dataset evaluation agent. You are required to evaluate the Q&amp;A dataset provided (towards the end of the prompt) based on the context provided (MS + SI). Please evaluate the dataset based on the following criteria:</p> <ol style="list-style-type: none"> <li>1. Accuracy: This is a measure of the ability of the LLM to correctly answer questions that have been generated both in or out of context – here, a penalty is introduced for answers that are incomplete or wrong, whether the question is in or out of context. It is defined as the ratio of the sum of the correctly answered questions, (TP + TN) to the total number of possible outcomes (TP + TN + FP + FN). A high accuracy score indicates better performance while a low accuracy indicates otherwise.</li> <li>2. Precision: This is a measure of the ability of the LLM to answer questions that have been generated only in context accurately – In addition to the penalties introduced above, here, a penalty is also introduced for (i) hallucinated questions even if answered correctly, (ii) incorrectly generated questions, and (iii) incorrectly categorized questions. It is defined as the ratio of accurately answered in-context questions (TP) to the total number of possible outcomes (TP + FN + FP + FN). A high precision score is desired as it indicates better performance; a low precision score indicates otherwise.</li> <li>3. Hallucination Rate: This is a measure of the proportion of Q&amp;A pairs hallucinated by the LLM. It is defined as the ratio of the sum of hallucinated Q&amp;A pairs (TN + FN) to the total number of possible outcomes (TP + TN + FP + FN). A low hallucination rate indicates better performance, while a high hallucination rate indicates otherwise.</li> <li>4. Hallucination Capture Rate: This is a measure of the LLM's ability to identify and correct a hallucinated (out-of-context) question it has generated itself. It is defined as the ratio of hallucinated questions generated but answered correctly (TN) to the total number of hallucinated questions generated (TN + FN). A high hallucination capture rate is desired as it means that the LLM can identify its mistake, while a low hallucination capture rate indicates otherwise.</li> </ol> <p>We classify a Q&amp;A pair based on its derivation and accuracy:<br/> True Positive (TP): The question is sourced from the context, and the answer is correct.<br/> False Positive (FP): The question is sourced from the context, but the answer is incorrect.<br/> True Negative (TN): The question is not derived from the context, yet the answer is correct.<br/> False Negative (FN): The question is not derived from the context, and the answer is incorrect.</p> <p>Calculate the score for the Q&amp;A dataset provided and please be very careful when counting the number of questions, ensuring that the number of questions you count is equal to the number of questions in the original dataset.</p> <p>Please provide the output in the following format:<br/> Total # of Questions<br/> TP_TF<br/> TN_TF<br/> FP_TF<br/> FN_TF<br/> TP_R<br/> TN_R<br/> FP_R<br/> FN_R<br/> TP_F<br/> TN_F<br/> FP_F<br/> FN_F</p> <p>The _TF means True/False, _R means Reasoning, and _F means Factual. After this, please also list the Q&amp;A's that are incorrect.<br/> Please include them under the only heading that's titled: "Incorrect questions"</p> <p><b>"User":</b> " CONTEXT:{context}\n\nQ&amp;A DATASET:{Q&amp;A data set}"</p> |

**Figure S1. Initial human-generated prompt for the task of evaluating Q&A pairs.** This prompt outlines instructions for assessing dataset accuracy, precision, hallucination rate, and hallucination capture rate. It

also defines criteria for classifying Q&A pairs into True Positive (TP), False Positive (FP), True Negative (TN), and False Negative (FN) categories, with instructions for output evaluation formatting.

| Template                                                                                                                                                                                                                                                                                                                                          |
|---------------------------------------------------------------------------------------------------------------------------------------------------------------------------------------------------------------------------------------------------------------------------------------------------------------------------------------------------|
| <pre>class GenerateSearchQuery(dspy.Signature):     """Write a simple search query that will help answer a     complex question."""     context_MS = dspy.InputField(desc="MS content")     context_SI = dspy.InputField(desc="SI content")     question = dspy.InputField(desc="questions with     labels")     query = dspy.OutputField()</pre> |
| Prompt                                                                                                                                                                                                                                                                                                                                            |
| <p><b>"Prompt":</b> "Extract the top {number_of_passages} relevant passages from the following context for the query: '{query}'\n\n Context:\n{context}"</p>                                                                                                                                                                                      |

**Figure S2. DSPy template for Retrieval-Augmented Generation (RAG).** The template utilizes DSPy to generate a list of search queries based on the questions from the Q&A dataset. These queries are subsequently passed to the LLM, which then extracts the most relevant passages from the provided context.

| Template                                                                                                                                                                                                                                                                                                                                                                                                                                                                                          |
|---------------------------------------------------------------------------------------------------------------------------------------------------------------------------------------------------------------------------------------------------------------------------------------------------------------------------------------------------------------------------------------------------------------------------------------------------------------------------------------------------|
| <pre>class FactJudge(dspy.Signature):     """Judge if the answer is factually correct based on     the context."""     context = dspy.InputField(desc="Context for the     prediction")     question = dspy.InputField(desc="Question to be     answered")     answer = dspy.InputField(desc="Answer for the     question")     factually_correct = dspy.OutputField(         desc="Is the answer factually correct based on the         context?",         prefix="Factual[Yes/No]:"     )</pre> |

**Figure S3. Template for DSPy-based judge agent.** This template utilizes DSPy to define an LLM-based Judge Agent, explicitly tasked with verifying factual correctness by evaluating the provided context alongside the corresponding Q&A pair.

| Template                                                                                                                                                                                                                                                                                                                                                                                                                                                                                                                                                                                                                                                                                       |
|------------------------------------------------------------------------------------------------------------------------------------------------------------------------------------------------------------------------------------------------------------------------------------------------------------------------------------------------------------------------------------------------------------------------------------------------------------------------------------------------------------------------------------------------------------------------------------------------------------------------------------------------------------------------------------------------|
| <pre> class FactExtract(dspy.Signature):     """     Read the research paper thoroughly. Identify and     extract key information,     facts, and data points relevant to the paper's main     topic.     """     context = dspy.InputField(desc="May contain relevant     facts")     output = dspy.OutputField(desc="""     Extract details such as chemical formulas,     critical temperatures, interaction types,     saturation magnetization values, coercive fields,     synthesis yields, structural roles,     magnetic properties, and synthesis methods.     Organize this information in a clear and concise     manner, separating each fact for easy reference.     """) </pre> |

**Figure S4. Template for DSPy-based FactExtract agent.** The template utilizes DSPy to define an LLM-based extraction agent designed to systematically identify, extract, and organize key facts, data points, and critical information relevant to the main topic of a research paper.

| a | Prompt                                                                                                                                                                                                                                                                                                                                                                                                                                                           |
|---|------------------------------------------------------------------------------------------------------------------------------------------------------------------------------------------------------------------------------------------------------------------------------------------------------------------------------------------------------------------------------------------------------------------------------------------------------------------|
|   | <p><b>"System instruction":</b> "You are a retriever. When I send you a question, your task is to retrieve a paragraph of at least 10 lines from the provided context. Ensure that you directly quote the text, rather than summarizing or paraphrasing.</p> <p>Please do not provide just the answer—focus on delivering a direct quote that meets the length requirement."</p> <p><b>"User":</b> "Context:{context}, Question:{question}, Answer:{answer}"</p> |

  

| b | Prompt                                                                                                                                                                                                                                                                                                                                                                                                                                                                                                                                                                                                                                                                                                                                                                                                                                                                                               |
|---|------------------------------------------------------------------------------------------------------------------------------------------------------------------------------------------------------------------------------------------------------------------------------------------------------------------------------------------------------------------------------------------------------------------------------------------------------------------------------------------------------------------------------------------------------------------------------------------------------------------------------------------------------------------------------------------------------------------------------------------------------------------------------------------------------------------------------------------------------------------------------------------------------|
|   | <p><b>"System instruction":</b> "You are a Q&amp;A dataset evaluation agent. You are required to evaluate the Q&amp;A dataset provided (towards the end of the prompt) based on the context provided (MS + SI).</p> <p>Please evaluate the Q&amp;A based on the following criteria: We classify a Q&amp;A pair based:</p> <p>True Positive (TP): The question is sourced from the context, and the answer is correct.</p> <p>False Positive (FP): The question is sourced from the context, but the answer is incorrect.</p> <p>True Negative (TN): The question is not derived from the context, yet the answer is correct.</p> <p>False Negative (FN): The question is not derived from the context, and the answer is incorrect.</p> <p>Your evaluation should only be only the following: [TP, TN, FP, FN]."</p> <p><b>"User":</b> "Context:{context}, Question:{question}, Answer:{answer}"</p> |

**Figure S5. Prompts for LLM retrieval and evaluation agents.** (a) Prompt guiding an LLM retriever to extract precise and direct quotes that is at least ten lines from the provided context. (b) Prompt instructing an LLM evaluation agent to classify Q&A pairs based on clearly defined criteria (TP, FP, TN, FN) based on the provided context.



| Prompt                                                                                                                                                                                                                                                                                                                                                                                                                                                                                                                                                                                                                                                                                                                                                                                                                                                                                                                                                                                                                                                                                                                                                                                             |
|----------------------------------------------------------------------------------------------------------------------------------------------------------------------------------------------------------------------------------------------------------------------------------------------------------------------------------------------------------------------------------------------------------------------------------------------------------------------------------------------------------------------------------------------------------------------------------------------------------------------------------------------------------------------------------------------------------------------------------------------------------------------------------------------------------------------------------------------------------------------------------------------------------------------------------------------------------------------------------------------------------------------------------------------------------------------------------------------------------------------------------------------------------------------------------------------------|
| <p><b>"System instruction":</b> " You are an LLM judge. You will be provided with a set of Q&amp;A pairs that have been assigned a label based on the following criteria:</p> <p>True Positive (TP): The question is sourced from the context, and the answer is correct.</p> <p>False Positive (FP): The question is sourced from the context, but the answer is incorrect.</p> <p>True Negative (TN): The question is not derived from the context, yet the answer is correct.</p> <p>False Negative (FN): The question is not derived from the context, and the answer is incorrect.</p> <p>Now, independently, without being influenced by the labels that have been assigned, please go through each Q&amp;A pair provided again. Next, assign a label to the Q&amp;A pair (TN/FP/TP/FN) based on your evaluation. You will be provided with the context from which you are required to assess the answer. If, after your evaluation, you find it is different from that provided initially, please assign a label 'changed'. If the evaluation is the same, please assign the label 'unchanged'.</p> <p>"</p> <p><b>"User":</b> "MS:{ms}, SI:{si}, Question:{question}, Answer:{answer}"</p> |

**Figure S6. Prompt for LLM-based judge agent.** The prompt instructs the LLM to independently reassess previously labeled Q&A pairs based on clearly defined criteria (TP, FP, TN, FN). The agent determines whether to maintain or revise the original label by explicitly comparing its evaluation to the initial assessment.

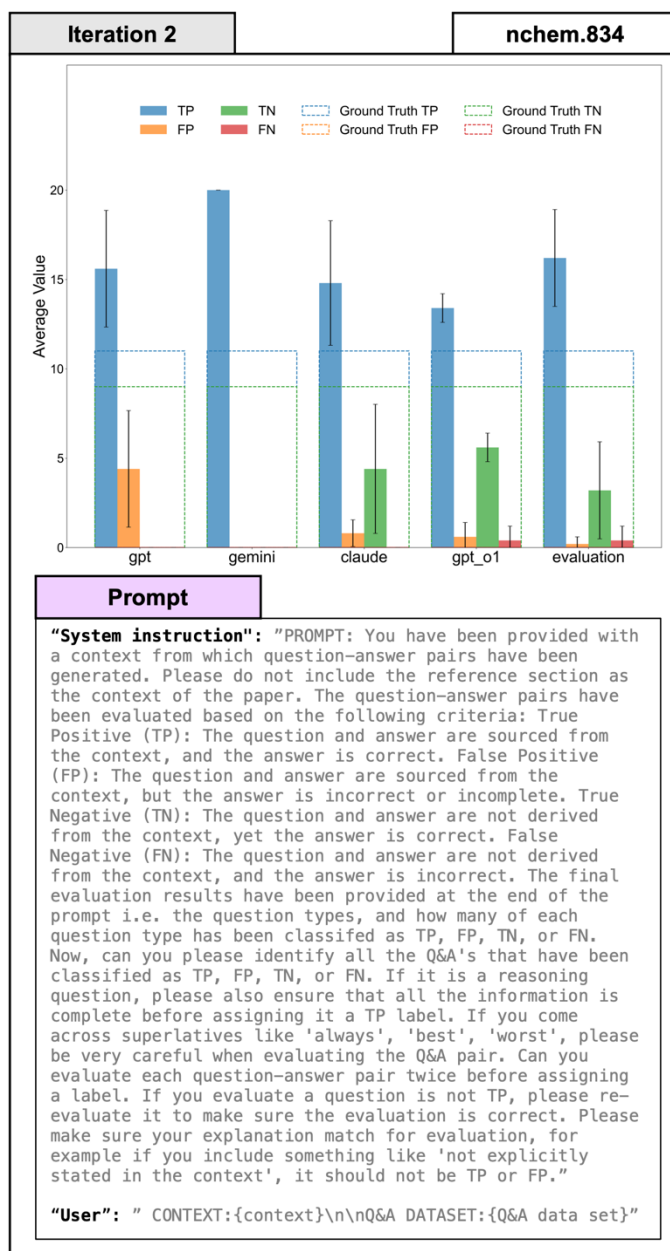

**Figure S7. Comparison of different LLMs in a single-hop Q&A task evaluated at iteration 2.** The legend indicates the counts for TP, FP, TN, FN, as well as ground truth values for these categories, across different models (GPT 4o, Gemini, Claude, GPT o1) and final weighted evaluation. Error bars represent the standard deviation across 3 evaluation runs. The prompt below details the instructions given to each LLM during the evaluation.

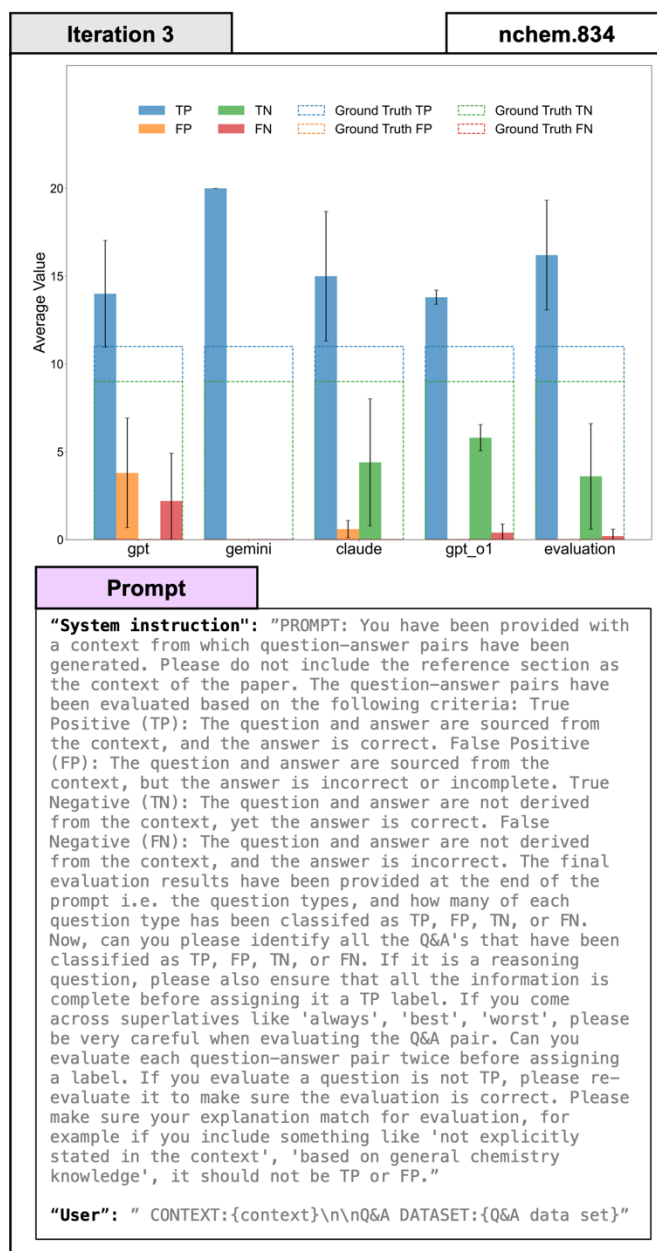

**Figure S8. Comparison of different LLMs in a Q&A task evaluated at iteration 3.** The legend indicates the counts for TP, FP, TN, FN, as well as ground truth values for these categories, across different models (GPT 4o, Gemini, Claude, GPT o1) and final weighted evaluation. Error bars represent the standard deviation across 3 evaluation runs. The prompt below details the instructions given to each LLM during the evaluation.

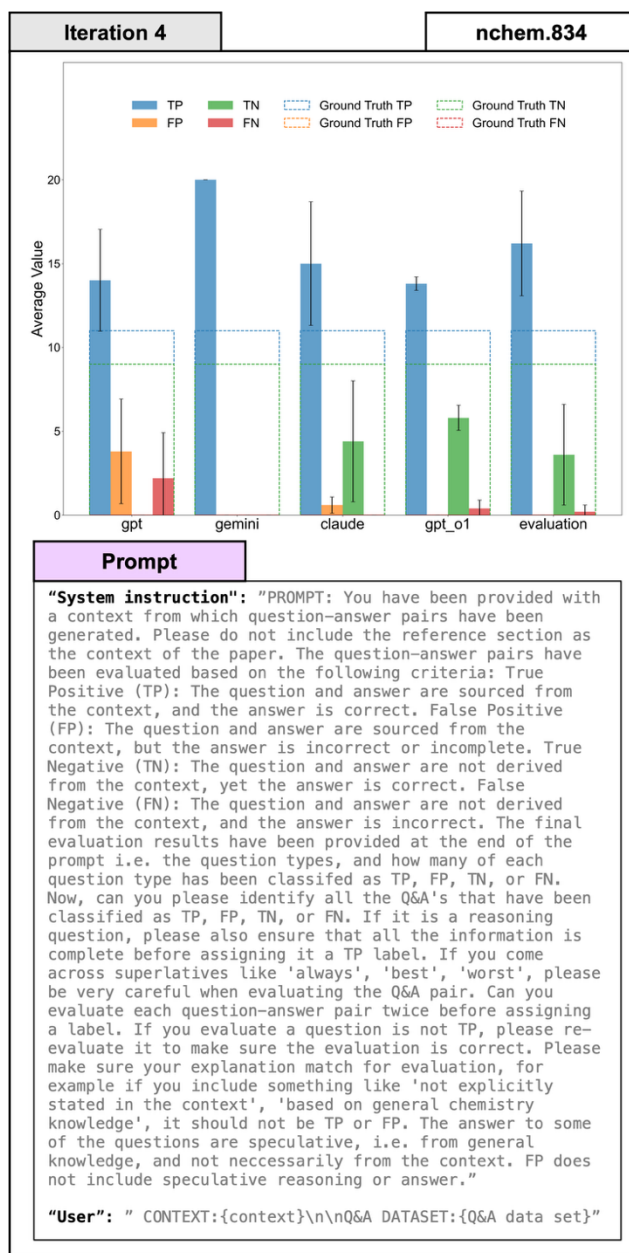

**Figure S9. Comparison of different LLMs in a single-hop Q&A task evaluated at iteration 4.** The legend indicates the counts for TP, FP, TN, FN, as well as ground truth values for these categories, across different models (GPT 4o, Gemini, Claude, GPT o1) and final weighted evaluation. Error bars represent the standard deviation across 3 evaluation runs. The prompt below details the instructions given to each LLM during the evaluation.

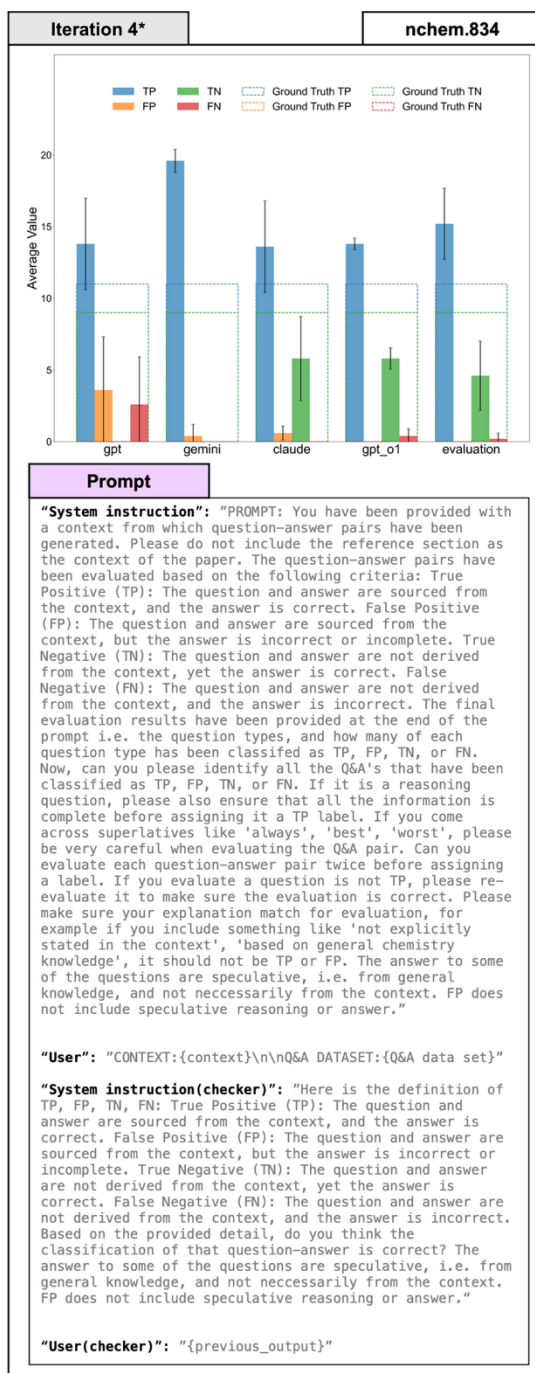

**Figure S10. Comparison of different LLMs in a Q&A task evaluated at iteration 4.** The legend indicates the counts for TP, FP, TN, FN, as well as ground truth values for these categories, across different models (GPT 4o, Gemini, Claude, GPT o1) and final weighted evaluation. Error bars represent the standard deviation across 3 evaluation runs. The prompt below details the instructions given to each LLM during the evaluation, and an additional "checker" instruction prompt designed to guide the LLMs in verifying and double-checking their evaluation outputs within the same iteration (Iteration 4\*).

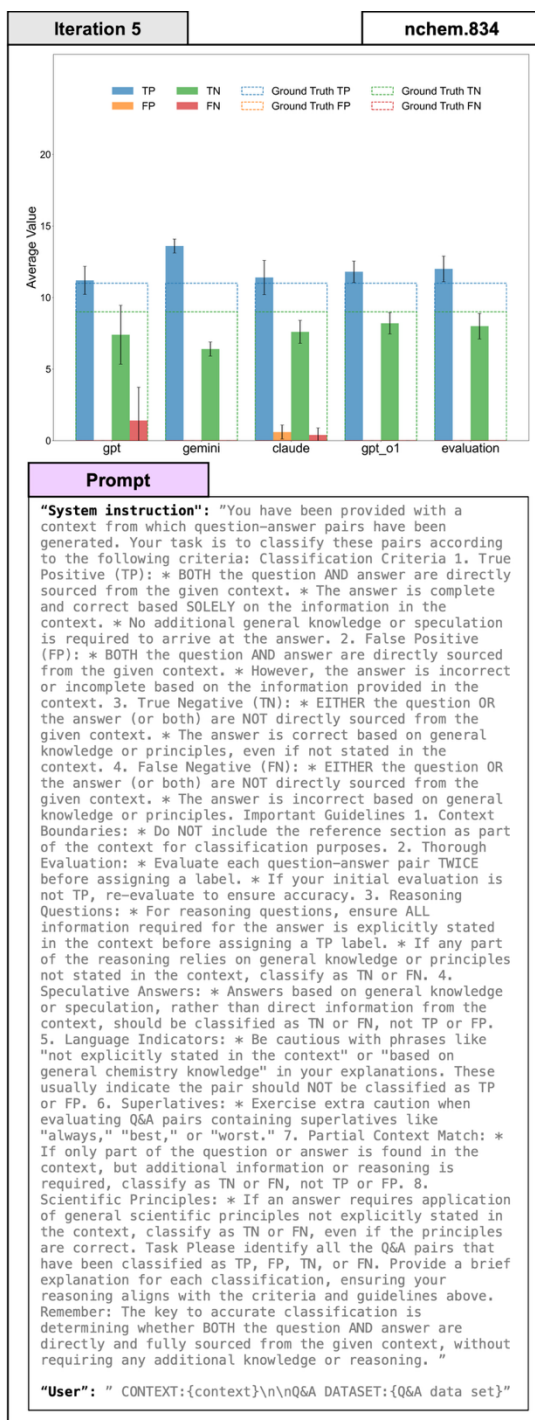

**Figure S11. Comparison of different LLMs in a Q&A task evaluated at iteration 5.** The legend indicates the counts for TP, FP, TN, FN, as well as ground truth values for these categories, across different models (GPT 4o, Gemini, Claude, GPT o1) and final weighted evaluation. Error bars represent the standard deviation across 3 evaluation runs. The prompt below details the instructions given to each LLM during the evaluation.

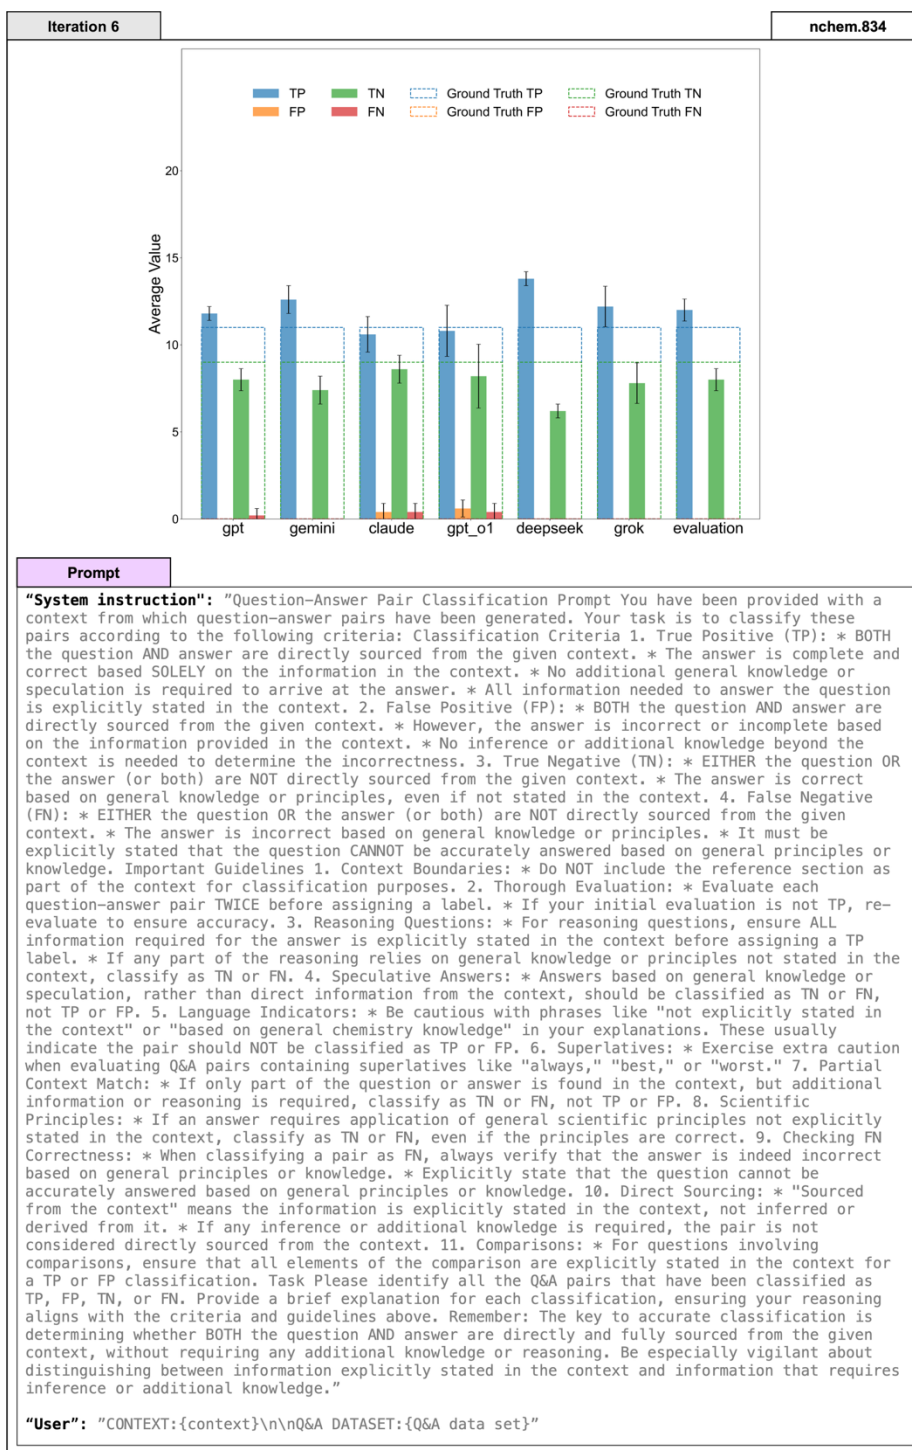

**Figure S12. Comparison of different LLMs in a Q&A task evaluated at iteration 7.** The legend indicates the counts for TP, FP, TN, FN, as well as ground truth values for these categories, across different models (GPT 4o, Gemini, Claude, GPT o1, Deepseek, Grok) and final weighted evaluation. Error bars represent the standard deviation across 3 evaluation runs. The prompt below details the instructions given to each LLM during the evaluation.



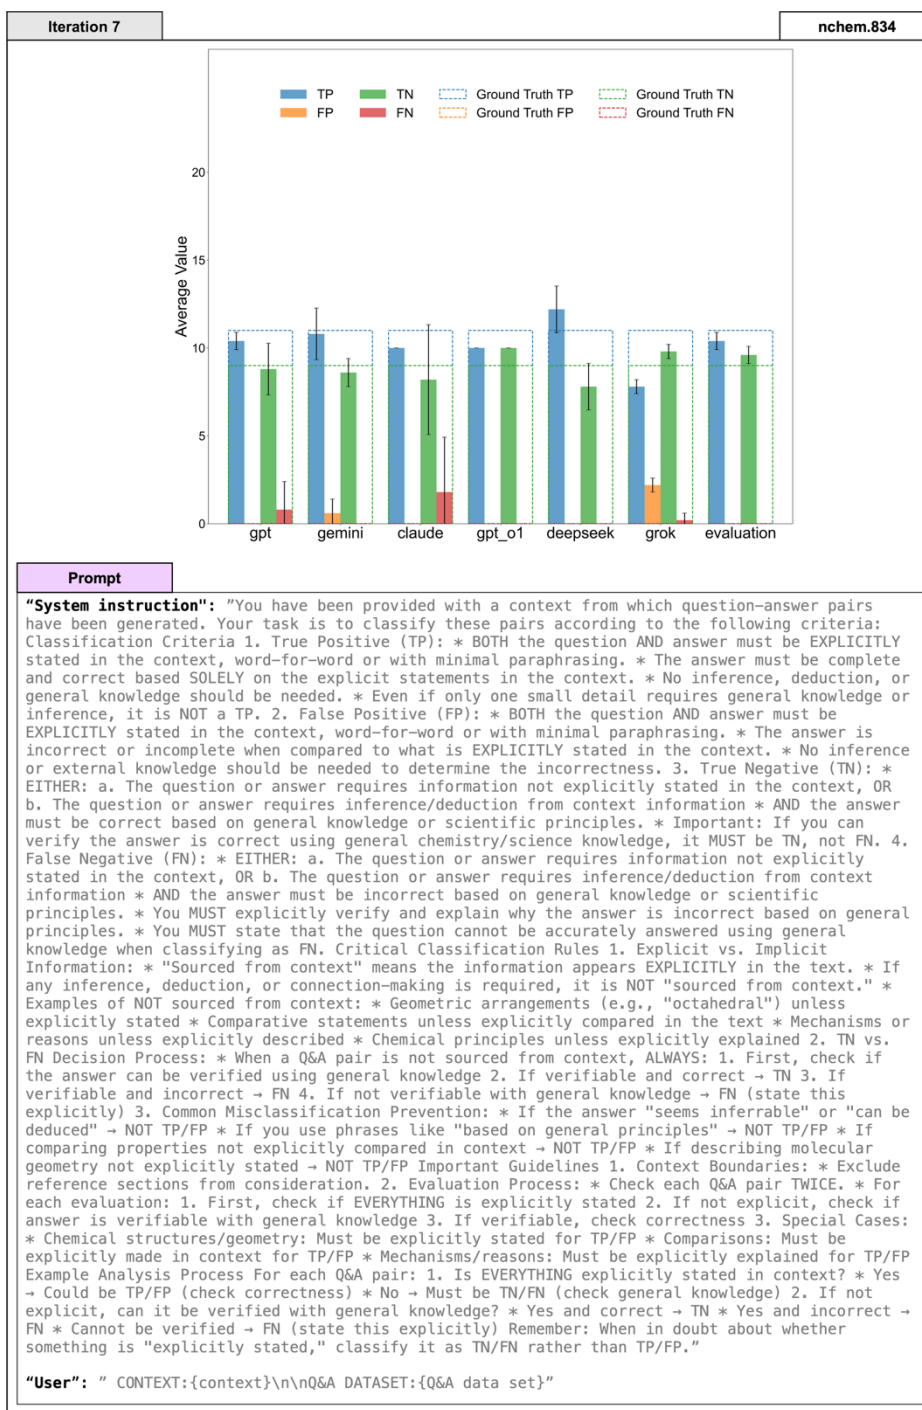

**Figure S13. Comparison of different LLMs in a Q&A task evaluated at iteration 7.** The legend indicates the counts for TP, FP, TN, FN, as well as ground truth values for these categories, across different models (GPT 4o, Gemini, Claude, GPT o1, Deepseek, Grok) and final weighted evaluation. Error bars represent the standard deviation across 3 evaluation runs. The prompt below details the instructions given to each LLM during the evaluation.



| Prompt                                                                                                                                                                                                                                                                                                                                                                                                                                                                                                                                                                                                                                                                                                                                                                                                                                                                                                            |
|-------------------------------------------------------------------------------------------------------------------------------------------------------------------------------------------------------------------------------------------------------------------------------------------------------------------------------------------------------------------------------------------------------------------------------------------------------------------------------------------------------------------------------------------------------------------------------------------------------------------------------------------------------------------------------------------------------------------------------------------------------------------------------------------------------------------------------------------------------------------------------------------------------------------|
| <p>"User": " Here is the prompt that I used to call LLMs:<br/> PROMPT: {previous_prompt}</p> <p>However, some LLMs {common_error_description}. Also, {additional_Error_description}. Here are some examples of wrong classification, and I want your revised prompt to prevent this:</p> <p>Example 1:<br/> classification: {misclassification_example_1_type}<br/> classification explanation: {misclassification_example_1_explanation}<br/> why this is wrong: {correction_for_example_1}</p> <p>Example 2:<br/> classification: {misclassification_example_2_type}<br/> classification explanation: {misclassification_example_2_explanation}<br/> why this is wrong: {correction_for_example_2}</p> <p>Example 3:<br/> classification: {misclassification_example_3_type}<br/> classification explanation: {misclassification_example_3_explanation}<br/> why this is wrong: {correction_for_example_3}"</p> |

**Figure S14. Template for prompt revision showing highlighted placeholders for creating improved prompts based on error analysis from LLM responses.** This template was used to send revision instructions to Claude GUI, enabling the iterative refinement process documented in iterations 5 through 7, as illustrated in figures S11-S13.

## Multi-hop Q&A

### Prompt

**"System":** "You are a multi-hop Question and Answering (Q&A) dataset generation agent.

CRITICAL REQUIREMENT: EVERY single question you generate MUST be multi-hop, meaning the answer CANNOT be found in a single location but requires synthesizing information from AT LEAST 2-3 different parts of the text (different paragraphs, pages, sections, or even different documents like manuscript vs supplementary information).

Multi-hop Question Criteria:

- The answer must require connecting information from multiple, non-adjacent text locations
- Simply finding a fact in one place is NOT multi-hop
- The reasoning must involve steps like: "First find X in section A, then find Y in section B, then combine/compare/relate them to get the answer"

You will analyze the given text about synthesis conditions and generate exactly 20 multi-hop Q&As. The text may contain information about multiple materials (e.g., ZIF-1, ZIF-2, ... ZIF-12).

Question Categories (ALL must be multi-hop):

1. **\*\*Factual Multi-hop\*\*** (6 questions): Require gathering facts from multiple locations
2. **\*\*Reasoning Multi-hop\*\*** (7 questions): Require logical reasoning across multiple information points
3. **\*\*True/False Multi-hop\*\*** (7 questions): Require verifying statements using multiple sources

Format each Q&A pair as:

```
{ "question": "your multi-hop question here",  
  "answer": "comprehensive answer synthesizing information from  
multiple sources",  
  "question_type": "factual/reasoning/True or False",  
  "difficulty_level": "easy/medium/hard" }
```

Generate exactly 20 multi-hop Q&A pairs and return them as a JSON array.

REMEMBER: Every single question must require multi-hop reasoning. Do not generate any single-hop questions."

**"User":** "Generate a multi-hop Q&A json file for the following text. Please include questions of different types including factual (6 questions), single-step reasoning (7 questions), and True or False (7 questions): {combined\_text}."

Figure S15. Updated prompt used in RetChemQA to generate multi-hop Q&A pairs.

| Prompt                                                                                                                                                                                                                                                                                                                                                                                                                                                                                                                                                                                                                                                                                                                                                                                                                                                                                                                                                                                                                                                                                                                                                                                                                                                                                                                                                                                                                                                                                                                                                                                                                                                                                                                                                                                                                                                                                                                                                                                                                                                                                                                                                                                                                                                                                                                                                                                                                                                                                                                                                                                                                                                                                                                                                                                                                                                                                                                                                                                                                                                                                                                                                                                                                                                                                                                                                                                                                                                                                                                                                                                                                                                                                                                                                                                                                                                                                                                                                                                                                                                                                                                                                                                                                                                                                                                                                                                                                                                                                                                                                                                                                                                                                                                                                                                                                                                                                                                                                                                                                                                                                                                                                                                                                                                                                                                                               |
|------------------------------------------------------------------------------------------------------------------------------------------------------------------------------------------------------------------------------------------------------------------------------------------------------------------------------------------------------------------------------------------------------------------------------------------------------------------------------------------------------------------------------------------------------------------------------------------------------------------------------------------------------------------------------------------------------------------------------------------------------------------------------------------------------------------------------------------------------------------------------------------------------------------------------------------------------------------------------------------------------------------------------------------------------------------------------------------------------------------------------------------------------------------------------------------------------------------------------------------------------------------------------------------------------------------------------------------------------------------------------------------------------------------------------------------------------------------------------------------------------------------------------------------------------------------------------------------------------------------------------------------------------------------------------------------------------------------------------------------------------------------------------------------------------------------------------------------------------------------------------------------------------------------------------------------------------------------------------------------------------------------------------------------------------------------------------------------------------------------------------------------------------------------------------------------------------------------------------------------------------------------------------------------------------------------------------------------------------------------------------------------------------------------------------------------------------------------------------------------------------------------------------------------------------------------------------------------------------------------------------------------------------------------------------------------------------------------------------------------------------------------------------------------------------------------------------------------------------------------------------------------------------------------------------------------------------------------------------------------------------------------------------------------------------------------------------------------------------------------------------------------------------------------------------------------------------------------------------------------------------------------------------------------------------------------------------------------------------------------------------------------------------------------------------------------------------------------------------------------------------------------------------------------------------------------------------------------------------------------------------------------------------------------------------------------------------------------------------------------------------------------------------------------------------------------------------------------------------------------------------------------------------------------------------------------------------------------------------------------------------------------------------------------------------------------------------------------------------------------------------------------------------------------------------------------------------------------------------------------------------------------------------------------------------------------------------------------------------------------------------------------------------------------------------------------------------------------------------------------------------------------------------------------------------------------------------------------------------------------------------------------------------------------------------------------------------------------------------------------------------------------------------------------------------------------------------------------------------------------------------------------------------------------------------------------------------------------------------------------------------------------------------------------------------------------------------------------------------------------------------------------------------------------------------------------------------------------------------------------------------------------------------------------------------------------------------------------------------|
| <p><b>"System instruction":</b> " Question-Answer Pair Classification Prompt</p> <p>You have been provided with a context from which question-answer pairs have been generated. Your task is to classify these pairs according to the following criteria:</p> <p>Classification Criteria:</p> <ol style="list-style-type: none"> <li>1. True Positive (TP): <ul style="list-style-type: none"> <li>* BOTH the question AND answer are directly sourced from the given context.</li> <li>* The answer is complete and correct based SOLELY on the information in the context.</li> <li>* No additional knowledge or inference beyond what is explicitly stated in the context is required.</li> </ul> </li> <li>2. False Positive (FP): <ul style="list-style-type: none"> <li>* BOTH the question AND answer appear to be sourced from the given context.</li> <li>* However, the answer is incorrect, incomplete, or requires inference beyond the explicit information provided.</li> </ul> </li> <li>3. True Negative (TN): <ul style="list-style-type: none"> <li>* EITHER the question OR the answer (or both) are NOT directly sourced from the given context.</li> <li>* The answer may be correct based on general knowledge, but cannot be fully validated using only the provided context.</li> </ul> </li> <li>4. False Negative (FN): <ul style="list-style-type: none"> <li>* EITHER the question OR the answer (or both) are NOT directly sourced from the given context.</li> <li>* The answer is incorrect based on general knowledge or principles.</li> </ul> </li> </ol> <p>Important Guidelines:</p> <ol style="list-style-type: none"> <li>1. Context Boundaries: <ul style="list-style-type: none"> <li>* Exclude any references or citations from consideration as part of the context.</li> </ul> </li> <li>2. Direct Sourcing: <ul style="list-style-type: none"> <li>* "Sourced from the context" means the information is explicitly stated, not inferred or derived.</li> <li>* If any inference or additional knowledge is required, the pair is not considered directly sourced.</li> </ul> </li> <li>3. Completeness: <ul style="list-style-type: none"> <li>* For TP classification, ensure ALL information required for the answer is explicitly stated in the context.</li> <li>* Partial matches or answers requiring additional inference should be classified as FP, TN or FN.</li> </ul> </li> <li>4. Specificity: <ul style="list-style-type: none"> <li>* Pay close attention to specific details, numbers, and phrasings in both questions and answers.</li> <li>* Minor discrepancies may change the classification.</li> </ul> </li> <li>5. General Knowledge: <ul style="list-style-type: none"> <li>* Be cautious with answers that seem correct but rely on general knowledge not provided in the context.</li> <li>* These should typically be classified as TN, not TP.</li> </ul> </li> <li>6. Inference and Reasoning: <ul style="list-style-type: none"> <li>* Questions requiring reasoning or inference beyond explicitly stated facts should not be classified as TP, even if the reasoning seems sound.</li> </ul> </li> <li>7. Precision in Language: <ul style="list-style-type: none"> <li>* Be wary of absolute terms like "always," "never," or "only" in questions or answers. Verify such claims are explicitly supported by the context for TP classification.</li> </ul> </li> <li>8. Numeric Values: <ul style="list-style-type: none"> <li>* For questions involving calculations or numeric values, ensure all required numbers and operations are explicitly provided in the context for TP classification.</li> </ul> </li> <li>9. Chemical Formulas and Structures: <ul style="list-style-type: none"> <li>* For questions about chemical formulas or structures, ensure the exact information is provided in the context. Do not rely on chemical knowledge to infer details not explicitly stated.</li> </ul> </li> <li>10. Experimental Procedures: <ul style="list-style-type: none"> <li>* For questions about experimental procedures or synthesis, all steps should be explicitly described in the context for a TP classification.</li> </ul> </li> <li>11. Material Properties: <ul style="list-style-type: none"> <li>* When classifying questions about material properties (e.g., surface area, gas uptake), ensure the specific values and conditions are explicitly stated in the context.</li> </ul> </li> <li>12. Comparative Statements: <ul style="list-style-type: none"> <li>* For questions comparing different materials or properties, ensure the context explicitly provides the comparison. Do not rely on calculations or inferences not directly stated.</li> </ul> </li> <li>13. Hypothetical Scenarios: <ul style="list-style-type: none"> <li>* Questions asking about hypothetical situations or changes to experimental conditions should be classified as TN unless the context explicitly discusses such scenarios.</li> </ul> </li> <li>14. Mechanism and Theoretical Explanations: <ul style="list-style-type: none"> <li>* Be cautious with answers that provide mechanisms or theoretical explanations. Ensure these are explicitly stated in the context, not inferred based on chemical knowledge.</li> </ul> </li> </ol> <p>. . .</p> |

**Figure S16. The best-performing prompt for the single-hop Q&A evaluation task.** This corresponds to the prompt used in iteration 9 as shown in **Figure 3(b)**. The final evaluation of 252 DOIs using this prompt is shown in **Figure 4(b)**. The remainder of the prompt is shown in the subsequent figure on the next page.

| Prompt                                                                                                                                                                                                                                                                                                                                                                                                                                                                                                                                                                                                                                                                                                                                                                                                                                                                                                                                                                                                                                                                                                                                                                                                                                                                                                                                                                                                                                                                                                                                                                                                                                                                                                                                                                                                                                                                                                                                                                                                                                                                                       |
|----------------------------------------------------------------------------------------------------------------------------------------------------------------------------------------------------------------------------------------------------------------------------------------------------------------------------------------------------------------------------------------------------------------------------------------------------------------------------------------------------------------------------------------------------------------------------------------------------------------------------------------------------------------------------------------------------------------------------------------------------------------------------------------------------------------------------------------------------------------------------------------------------------------------------------------------------------------------------------------------------------------------------------------------------------------------------------------------------------------------------------------------------------------------------------------------------------------------------------------------------------------------------------------------------------------------------------------------------------------------------------------------------------------------------------------------------------------------------------------------------------------------------------------------------------------------------------------------------------------------------------------------------------------------------------------------------------------------------------------------------------------------------------------------------------------------------------------------------------------------------------------------------------------------------------------------------------------------------------------------------------------------------------------------------------------------------------------------|
| <p>15. Implicit Information:<br/> * Avoid classifying as TP any question-answer pairs that rely on information that seems obvious or implicit but is not explicitly stated in the context.</p> <p>16. Strict Interpretation:<br/> * When evaluating question-answer pairs, adopt a very strict interpretation of what constitutes "directly sourced" information. If there's any doubt, lean towards classifying as FP or TN rather than TP.</p> <p>17. Context Verification:<br/> * For each classification, explicitly reference the relevant part of the context that supports your decision. This ensures a thorough check against the provided information.</p> <p>18. Mathematical Operations:<br/> * For questions requiring simple mathematical operations (e.g., averaging, ratios), classify as TP only if ALL required values are explicitly stated in the context AND the operation is trivial.<br/> * For more complex calculations or those requiring multiple steps, classify as TN or FP unless the context explicitly provides the calculated result.</p> <p>19. Partial Information:<br/> * If a question-answer pair contains some information from the context but also includes additional unsupported claims or details, classify as FP rather than TP.</p> <p>20. Time Sensitivity:<br/> * Be aware of the potential for time-sensitive information. If a question-answer pair relies on information that may change over time (e.g., "current" record holders, latest discoveries), ensure the context explicitly supports the claim for the relevant time period.</p> <p>21. Structural Inferences:<br/> * For questions about molecular or crystal structures, ensure that all structural details are explicitly stated in the context. Do not rely on chemical knowledge to infer structural information not directly provided.</p> <p>22. Charge Balance:<br/> * When dealing with questions about ionic compounds or charge states, ensure that the context explicitly states the</p> <p>"User": " CONTEXT:{context}\n\nQ&amp;A DATASET:{Q&amp;A data set}"</p> |

**Figure S16. Continuation of the best-performing prompt shown for the single-hop Q&A evaluation task.**

---

**Algorithm 1** Prompt Generation Algorithm

---

```
1: Input: List path doi_dirs containing document files, List path json_dirs containing data files, Dictionary
   ground truth ground_truths where [key]: json_filename, [value]: ground_truth_evaluation
2: Initialize prompts to empty list
3: Initialize num_qs to empty list
4: Initialize contexts to empty list
5: Initialize ground_truth to empty list
6: for each doi_dir, json_dir in directory doi_dirs, json_dirs do
7:   if doi path doi_dir or json path json_dir not exists then continue
8:   end if
9:   context  $\leftarrow$  PROCESSDOI(doi_path)
10:  output_text  $\leftarrow$  "CONTEXT:" + context + "\n\nQ&A DATASET:"
11:  num_q  $\leftarrow$  0
12:  for pair in LoadJSONQuestions(json) do
13:    output_text  $\leftarrow$  output_text + str(pair) + "\n\n"
14:    num_q  $\leftarrow$  num_q + 1
15:  end for
16:  Append output_text to prompts
17:  Append num_q to num_qs
18:  Append context to contexts
19:  Append ground_truths[json_filename] to ground_truth  $\triangleright$  where json_filename is the last part of jsons'
   path
20: end for
21: return prompts, num_qs, contexts, ground_truth
22: function PROCESSDOI(doi_dir)
23:   combined_text  $\leftarrow$  empty string
24:   for each file in doi_dir do
25:     text  $\leftarrow$  PROCESSFILE(file)
26:     combined_text  $\leftarrow$  combined_text + text
27:   end for
28:   return combined_text
29: end function
30: function PROCESSFILE(file_path)
31:   ext  $\leftarrow$  file extension from file_path
32:   if ext is '.pdf' then
33:     return EXTRACTTEXTFROMPDF(file_path)
34:   else if ext is '.docx' or ext is '.doc' then
35:     return PROCESSDOCX(file_path)
36:   else if ext is '.xml' then
37:     return PROCESSXML(file_path)
38:   else if ext is '.xhtml' then
39:     return PROCESSXHTML(file_path)
40:   end if
41: end function
42: function LOADJSONQUESTIONS(file_path)
43:   Open file_path in read mode
44:   output  $\leftarrow$  JSON parsed from the file
45:   Initialize possible_keys  $\leftarrow$  ['qas', 'Q&A', 'QAs', 'questions', 'data', 'dataset']
46:   found_key  $\leftarrow$  None
47:   for key in possible_keys do
48:     if key exists in output then
49:       found_key  $\leftarrow$  key
50:       Break
51:     end if
52:   end for
53:   if found_key is None then
54:     return output
55:   else
56:     return output[found_key]
57:   end if
58: end function
```

---

**Figure S17. Algorithm detailing the generation of the "user" portion of the prompt.** This procedure integrates the entire textual context extracted from documents associated with each DOI, alongside all corresponding question-answer pairs or synthesis conditions obtained from associated JSON datasets. The resulting structured prompt is subsequently used as input for LLM evaluation.

---

**Algorithm 2** LLMs' API Call Algorithm

---

```
1: Input: String system_instruction, List prompts prompts containing context and Q&A pairs data, List
   Integer num_qs contains number of Q&A pairs per DOI, String directory, Integer runs=1
2: Initialize a thread pool executor
3: Submit the following tasks to the executor:
   Task 1: Call gpt_4o using LLM_API_Call with:
       system_instruction, prompts, num_qs, and directory/4o.xlsx, runs
   Task 2: Call gemini using LLM_API_Call with:
       system_instruction, prompts, num_qs, and directory/gemini.xlsx, runs
   Task 3: Call claude using LLM_API_Call with:
       system_instruction, prompts, num_qs, and directory/claude.xlsx, runs
   Task 4: Call gpt_o1 using LLM_API_Call with:
       system_instruction, prompts, num_qs, and directory/o1.xlsx, runs
   Task 5: Call deepseek using LLM_API_Call with:
       system_instruction, prompts, num_qs, and directory/deepseek.xlsx, runs
   Task 6: Call grok using LLM_API_Call with:
       system_instruction, prompts, num_qs, and directory/grok.xlsx, runs
4: Wait for all tasks in the executor to complete
5: Make summary df using SUMMARY_DF(directory, file_name, ground_truth, runs=1)
6: function LLM_API_CALL(system_instruction, prompts, num_qs, output_file_name, runs=1)
7:   for t from 0 to runs-1 do
8:     for i from 0 to len(prompts) do
9:       sheet_name  $\leftarrow$  f'{t} loop {i} DOI'
10:      prompt  $\leftarrow$  prompts[i]
11:      while True do
12:        Generate completion from LLM model with:
          system_instruction and prompt with Structure Output
13:        result_df  $\leftarrow$  Convert result into DataFrame using llm_output_to_df
14:        if len(result_df) = num_qs[i] and result_df.shape[1] = 5 then
15:          break
16:        end if
17:      end while
18:      if output_file_name exists then
19:        Open Excel writer in append mode
20:        Write result_df to sheet sheet_name
21:      else
22:        Open Excel writer in write mode
23:        Write result_df to sheet sheet_name
24:      end if
25:    end for
26:  end for
27: end function
28: function LLM_OUTPUT_TO_DF(LLM_output)
29:   return DataFrame converted from LLM_output
30: end function
```

---

**Figure S18.** Algorithm detailing the procedure used for calling various LLM APIs to perform evaluations of generated question-answer pairs or synthesis conditions. The algorithm systematically submits structured prompts (including contexts and associated datasets) to each LLM, processes their responses, and compiles results into Excel sheet for subsequent analysis and comparison across models.

---

**Algorithm 3** System Instruction (Classification Prompt) Optimization

---

```
1: Initialize trial  $\leftarrow 0$ 
2: Initialize best_input  $\leftarrow \text{None}$ 
3: Initialize previous_input  $\leftarrow \text{None}$ 
4: while True do
5:   Increment trial by 1
6:   if last trial then
7:     break
8:   end if
9:   folder_name  $\leftarrow \mathbf{f}\{\mathbf{trial}\}$ 
10:  Create directory folder_name if it does not exist
11:  if not first trial then
12:    Read classification_prompt from file of the directory in previous trial
13:  end if
14:  Make API Call from the desired LLMs using Algorithm 2 and make summary DataFrame, dfs,
  using Function 1
15:  Calculate cumulative statistics:
16:  average_total_catch  $\leftarrow$  Cumulative Average Non-TP Catching Rate
17:  average_accuracy  $\leftarrow$  Cumulative Average Accuracy
18:  Save metrics to text files in folder_name
19:  Generate mismatch evaluations:
20:  Initialize combined_mismatch_dict  $\leftarrow$  empty dictionary
21:  for key, df in dfs do
22:    Parse mismatches between evaluations and ground truth
23:    Append mismatch details to combined_mismatch_dict
24:  end for
25:  Format output string with context and evaluations:
26:  formatted_input  $\leftarrow$  String combining mismatch analysis and prompt refinement inputs
27:  Generate revised classification prompt using LLM:
28:  classification_prompt  $\leftarrow$  Call to claude_client with formatted_input
29:  Save revised classification prompt and formatted input to files in folder_name
30:  Update best_input and previous_input based on past trials
31: end while
```

---

**Figure S19. Algorithm illustrating the automated optimization process for refining the "system instruction" (classification prompt) component shown in Figure 3(a).** This algorithm employs iterative API calls specifically to Claude, leveraging evaluation results from previous trials to iteratively enhance prompt performance. The optimization involves systematically adjusting instructions based on cumulative accuracy metrics, mismatch analyses against ground truth data, and output from previous LLM evaluations.

---

**Function 1** Summary DataFrame Function

---

```
1: function SUMMARY_DF(String directory, String directory, Dictionary ground truth ground_truths where  
   [key]: json_filename, [value]: ground_truth_evaluation, Integer runs=1)  
2:   for t from 0 to runs-1 do  
3:     for i from 0 to len(ground_truth) do  
4:       sheet_name  $\leftarrow$  f'{t} loop {i} DOI'  
5:        $\triangleright$  Load required Excel sheets  
6:       gpt_4o_df  $\leftarrow$  Load sheet sheet_name from directory/4o.xlsx  
7:       gemini_df  $\leftarrow$  Load sheet sheet_name from directory/gemini.xlsx  
8:       claude_df  $\leftarrow$  Load sheet sheet_name from directory/claude.xlsx  
9:       gpt_o1_df  $\leftarrow$  Load sheet sheet_name from directory/o1.xlsx  
10:      output_df  $\leftarrow$  MERGE_DF([gpt_4o_df, gemini_df, claude_df, gpt_o1_df])  
11:      output_df  $\leftarrow$  WEIGHTED_MODE(output_df, [eval_columns], [0.23, 0.23, 0.23, 0.3])  
12:      output_df['ground_truth']  $\leftarrow$  ground_truth[i]  
13:      file_path  $\leftarrow$  f'directory/file_name'  
14:      if file_path exists then  
15:        Open Excel writer in append mode  
16:        Write output_df to sheet sheet_name  
17:      else  
18:        Open Excel writer in write mode  
19:        Write output_df to sheet sheet_name  
20:      end if  
21:    end for  
22:  end for  
23: end function  
24: function MERGE_DF(dfs)  
25:   return Merged DataFrame to keep only the question, answer, question type, evaluation and explanation of each LLM  
26: end function  
27: function WEIGHTED_MODE(df, columns, [weights])  
28:   return A list of weighted mode for each row in columns (calculated based on weights)  
29: end function
```

---

**Figure S20. The function that creates a summary excel sheet containing question-answer pairs with evaluations from multiple LLMs.** The SUMMARY\_DF function processes evaluation sheets from different LLMs, merges their assessments using the MERGE\_DF helper function, and applies weighted voting through the WEIGHTED\_MODE function. The resulting excel sheet includes columns for questions, answers, question types, individual LLM evaluations and their explanations, ground truth classifications, and weighted consensus evaluations.



**Breakdown of Agent vs Human Mismatches  
(Average Across 3 Trials)**

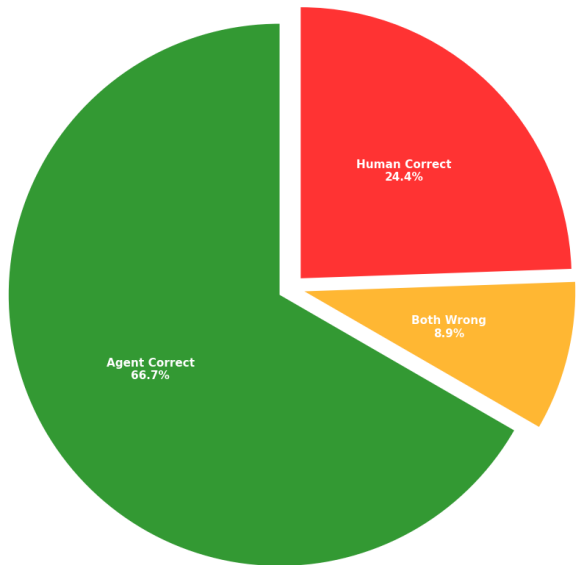

**Figure S21. Breakdown of agent versus human evaluation mismatches averaged across three trials for multi-hop Q&A pairs. Total average mismatches: 45 out of 523 Q&A pairs.**

| Tie-breaker Model | Accuracy (%) | TP Catch Rate (%) | Non-TP Catch Rate (%) |
|-------------------|--------------|-------------------|-----------------------|
| GPT-4o            | 93.41        | 98.83             | 34.21                 |
| Gemini            | 93.61        | 99.47             | 30.26                 |
| Claude            | 94.16        | 99.06             | 38.30                 |
| GPT-o1            | 94.03        | 99.24             | 35.53                 |

**Table S1. Single-Hop Q&A Tie-Breaker Performance.**

| Tie-breaker Model | Accuracy (%) | TP Catch Rate (%) | Non-TP Catch Rate (%) |
|-------------------|--------------|-------------------|-----------------------|
| GPT-4o            | 98.31        | 99.41             | 38.10                 |
| Gemini            | 98.31        | 99.60             | 30.16                 |
| Claude            | 98.25        | 99.60             | 28.57                 |
| GPT-o1            | 98.38        | 99.47             | 38.10                 |

**Table S2. Multi-Hop Q&A Tie-Breaker Performance.**

| Tie-breaker Model | Accuracy (%) | TP Catch Rate (%) | Non-TP Catch Rate (%) |
|-------------------|--------------|-------------------|-----------------------|
| <b>GPT-4o</b>     | 95.86        | 99.12             | 36.16                 |
| <b>Gemini</b>     | 95.96        | <u>99.54</u>      | 30.21                 |
| <b>Claude</b>     | 96.21        | 99.33             | 33.44                 |
| <b>GPT-o1</b>     | <u>96.21</u> | 99.36             | <u>36.82</u>          |

**Table S3. Average Tie-Breaker Performance across both single-hop and multi-hop for each model.**

| Iteration        | Changes Made                                                                                                                        | Observations                                                                                                | Notes                                                                          |
|------------------|-------------------------------------------------------------------------------------------------------------------------------------|-------------------------------------------------------------------------------------------------------------|--------------------------------------------------------------------------------|
| <b>1</b>         | Tested on one paper (nchem.834) with 11 TP and 9 TN Q&A pairs.                                                                      | Final evaluation classified all questions as TPs entirely missing the non-TP Q&A pairs.                     | Only GPT-o1 was able to correctly classify some of the Q&A pairs as TNs.       |
| <b>2</b>         | Made prompt better by asking LLMs to be careful with vague answers and those containing superlatives like always/best.              | Final evaluation saw an increase in TNs, however a small number of FPs and FNs also remained alongside TPs. | Gemini still only generated TPs, while the other models showed an improvement. |
| <b>3</b>         | Modified the prompt to include an example instructing the LLMs to not rely on general domain knowledge.                             |                                                                                                             | LLMs continued to rely on general knowledge when classifying Q&A pairs.        |
| <b>4</b>         | Instructed the LLMs to avoid labeling speculative questions as FP and emphasized contextual grounding.                              | The distribution of TP, FP, TN, and FN in the final evaluation remained largely <i>unchanged</i> .          | The LLMs continued to classify those Q&A pairs as FPs.                         |
| <b>4*</b>        | Used the same prompt as Iteration 4 but introduced a secondary ‘checker’ prompt to reassess and validate the outputs.               |                                                                                                             | The secondary ‘checker’ provided no benefit.                                   |
| <b>5</b>         | Used Claude 3.5 Sonnet to optimize the prompt using a template addressing frequent misclassifications with corrections. (Figure 3a) | Final evaluation saw a big improvement reaching close to our target human evaluated benchmark.              | Claude is excellent at prompt optimization.                                    |
| <b>6 &amp; 7</b> | Introduced stricter context constraints, clearer classification rules, and a refined template.                                      | Final evaluation saw a marginal improvement in performance.                                                 | The more detailed the prompt is, the better the LLMs perform.                  |

**Table S4. Summary of Iterative Prompt Refinement and Evaluation Results.**

| Dataset | TP   | FP  | TN | FN  |
|---------|------|-----|----|-----|
| ALL     | 4861 | 141 | 20 | 121 |
| OPT     | 141  | 7   | 10 | 0   |

**Table S5. Distribution of Q&A classification types in the optimization (OPT, 7 DOIs) and final 252 DOIs (ALL) test sets.**

### **Summary of Classification labels**

Each question–answer (Q&A) pair is first checked to determine whether it was generated from the context provided in the prompt:

True Positive (TP): The question is based on the given context, and the answer is correct.

False Positive (FP): The question is based on the given context, but the answer is incorrect or incomplete.

True Negative (TN): The question is not based on the given context, and the model correctly identifies this (e.g., states that the answer cannot be found in the context).

False Negative (FN): The question is not based on the given context, and the model provides an incorrect answer.

### **Model versions and parameters**

The API versions are: `claude_model = 'claude-3-5-sonnet-20240620'`, `gemini_model = 'gemini-1.5-pro-001'`, `openai_4o_model = "gpt-4o-2024-08-06"`, `openai_o1_model = "o1-preview-2024-09-12"`

The temperature is set to 1. Please note that the random seed values for these hosted APIs (OpenAI, Anthropic, and Google) are not user accessible. Model sampling is handled internally, and reproducibility is tested by fixing the API version, temperature, and prompt.
